# Supplementary material
Source: PubMed Central journal article supplement (PMC3365160)
Supplement: 1202908109_pnas.201202908SI.pdf [file 1202908109_pnas.201202908SI.pdf]

# Supporting Information

Li et al. 10.1073/pnas.1202908109

## SI Materials and Methods

**LPS Purification and Lipid A Isolation.** *Fn* and *Escherichia coli* LPS were extracted using a hot phenol/water extraction method as described (1). Further treatment of LPS with RNase A, DNase I, and proteinase K ensured removal of contaminating nucleic acids and proteins (2). Subsequently, LPS samples were additionally subjected to Folch and Vogel extractions to remove contaminating phospholipids and TLR-2 agonist-contaminating proteins, respectively (3, 4). Lipid A was isolated after hydrolysis in 1% SDS (wt/vol) at pH 4.5 as described (5). Briefly, 500  $\mu$ L of 1% SDS (wt/vol) in 10 mM sodium acetate, pH 4.5, was added to a lyophilized sample. Samples were incubated at 100 °C for 1 h and lyophilized. The dried pellets were washed in 100  $\mu$ L of water and 1 mL of acidified ethanol [100  $\mu$ L 4N HCl in 20 mL 95% ethanol (vol/vol)]. Samples were centrifuged at 5,000  $\times$  g for 5 min. The lipid A pellet was further washed (three times) in 1 mL of 95% ethanol. The entire series of washes was repeated twice. Samples were resuspended in 500  $\mu$ L of water, frozen on dry ice, and lyophilized.

**One-Step Total Lipids Isolation Method.** Lyophilized cells (100 ng–10  $\mu$ g) were suspended in 100  $\mu$ L chloroform:methanol (2:1, vol/vol), vortexed for 1 min, and centrifuged at 5,000  $\times$  g for 1 min. The resulting supernatant was collected and spotted (1  $\mu$ L) directly onto the MALDI sample plate followed by 1  $\mu$ L matrix for matrix-assisted laser desorption ionization (MALDI)-TOF/TOF MS analysis. The supernatant was dried under a stream of nitrogen (6).

**Mass Spectrometry and Gas Chromatography Procedures.** Lipid A samples were prepared for analysis at 1.0 mg/mL in chloroform:methanol (1:1, v:v). The sample solution was first mixed 1:1 with a matrix solution, which consisted of 10 mg/mL of 5-Chloro-2-mercaptobenzothiazole (CMBT) in chloroform:methanol:water (4:4:1, v:v:v). Samples were spotted onto the stainless steel 384 target and allowed to air dry before insertion into the mass spectrometer. Analyses were performed on a Kratos Axima QIT (Shimadzu) MALDI quadrupole ion trap time-of-flight (QIT-TOF) mass spectrometer equipped with a 337-nm N2 laser. The instrument was operated in the negative ion mode and calibrated externally using a peptide mixture that consisted of angiotensin II, angiotensin I, neurotensin, ACTH clip (117), and ACTH clip. Argon was used as the collision gas for MS<sup>n</sup>. Typically, 1,000–3,000 laser shots were summed for each MS and MS<sup>n</sup> analysis.

LPS fatty acids were derivatized to fatty acid methyl esters and analyzed by gas chromatography as described (7, 8). Briefly, LPS fatty acids were derivatized to fatty methyl esters with 2 M methanolic HCl at 90 °C for 18 h (Alltech) and quantified by GC using an HP 5890 series II with a 7673 auto injector. Pentadecanoic acid (10  $\mu$ g; Sigma) was added as an internal standard.

**Construction of *Fn* *lpxD1*-Null and *lpxD2*-Null Mutants.** Two linear deletion fragments of DNA consisting of kanamycin cassette flanked by 1,500 bp of *Fn* *lpxD1* and *lpxD2* upstream and downstream were generated by overlap PCR. Next, two linear deletion fragments were transformed into *Fn* by chemical transformation, and resistant colonies were selected on Tryptic soy broth supplemented with cysteine (TSB-C) plate containing kanamycin (10  $\mu$ g/mL). *Francisella novicida* were grown in 100 mL of Chamberlain's medium to A<sub>600</sub> of 0.5 (9). Cells were harvested by centrifugation and resuspended in 5 mL of transformation buffer. Next, 1 mL of the cell suspension was mixed with 500 ng of the knockout fragment and incubated with

shaking (100 rpm at 37 °C) for 30 min, 5 mL of Chamberlain's medium was added, and the mixture was shaken at 37 °C for 3 h at 250 rpm. The cells were harvested and resuspended in 1 mL of TSB-C plate containing kanamycin (10  $\mu$ g/mL). Genomic DNA was isolated from a kanamycin-resistant transformant, and the replacement of the *lpxD1* and *lpxD2* genes was confirmed by PCR and DNA sequencing.

## Cloning *LpxD1* and *LpxD2* and Complementation Expressing in *Fn*.

The *lpxD1* and *lpxD2* coding regions were amplified from genomic *Fn* DNA prepared by PCR with *Pfu* Turbo DNA polymerase (Stratagene). The primers (pMP\_ *lpxD1*\_forward, pMP\_ *lpxD1*\_reverse, pMP\_ *lpxD2*\_forward, pMP\_ *lpxD2*\_reverse) were used for PCR amplification. PCR amplified *lpxD1* and *lpxD2* DNA were cloned into the plasmid pMP822 and pMP831 (10). The resulting plasmids, designed pMP822-*lpxD1*, pMP822-*lpxD2*, pMP831-*lpxD1*, pMP831-*lpxD2*, were introduced into *Fn* cells by cryotransformation, and the resulting bacterial transformants were selected on TSB-C plates at 37 °C containing hygromycin (100  $\mu$ g/mL).

**RNA Isolation and Quantitative PCR.** RNA was extracted from midlog phase (OD<sub>600</sub> –0.4–0.5) grown *Fn* at 21 °C and 37 °C by the RiboPure-Bacteria kit (Ambion). Five micrograms of total RNA was reverse transcribed to cDNA by SuperScript-II RNase H reverse transcriptase (Invitrogen). Five nanograms of cDNA was used for quantitative PCR with the SYBR green PCR master mixture in the Bio-Rad iCycler. Relative quantification was used to evaluate the expression of chosen genes. All primers were designed to give 200–220 nucleotide amplicons, have a G + C range of 30–50%, and a melting temperature of 58–60 °C. Relative copy numbers (RCN) and expression ratios of selected genes were normalized to the expression of 16s rRNA, and *dnaK*.

***LpxD1* and *LpxD2* Expression and Purification.** Two plasmids (designated pET28a-*lpxD1* and pET28a-*lpxD2*), which encode a fully functional *LpxD1* and *LpxD2* protein, respectively, modified with an N-terminal 6His tag followed by a one-glycine residue linker and the P2A substitution, was constructed and transformed into *E. coli* Rosetta (DE3)/pLysS (Invitrogen) (11, 12). Expression of *LpxD1* and *LpxD2* at 37 °C was induced for 3.5 h with 1 mM isopropyl- $\beta$ -d-thiogalactopyranoside (IPTG) when the A<sub>600</sub> of the cells, growing on LB broth supplemented with 100  $\mu$ g/mL kanamycin, reached 0.5. All subsequent procedures were carried out at 4 °C. Cells from a 3-L culture were harvested by centrifugation at 4,000  $\times$  g. The pellet was resuspended in 50 mL of buffer A [50 mM Tris chloride, pH 8.0, containing 200 mM sodium chloride, 1 mM DTT, 10% glycerol (vol/vol)], and the cells were again centrifuged at 4,000  $\times$  g. The pellet was resuspended in 50 mL of buffer A and the cells were lysed by one passage through a French pressure chamber at 18,000 psi. After a 30-min centrifugation at 4,000  $\times$  g, the cell-free extract was loaded onto a 10-mL Ni-NTA column (Qiagen). After washing with 100 mL of buffer A, *LpxD* was eluted in one fraction with 50 mL of buffer B containing 200 mM imidazole, and the entire fraction was loaded onto a 318-mL High Load 26/60 Superdex-200 gel filtration column (GE Healthcare), equilibrated in 10 mM Tris chloride, pH 8.0, containing 1 mM DTT and 500 mM NaCl. The protein eluted as a sharp peak consistent with the molecular weight predicted for the *LpxD* homotrimer. Fractions were pooled and concentrated to 24 mg/mL, as determined by the bicinchoninic acid assay (Bio-Rad). The

protein solution was then passed through a 0.2- $\mu$ m filter and stored in aliquots at  $-80^{\circ}\text{C}$ .

**Cationic Antimicrobial Peptides Sensitivity and Antibiotic Minimum Inhibitory Concentration (MIC) Test.** Susceptibility of *lpxD1*-null mutant, *lpxD2*-null mutant, WT *Fn* to polymyxin B was determined using a commercial gradient strip assay (Etest AB; bioMerieux) according to the manufacturer's instructions. The MIC test uses 2 $\times$  strength TSB-C, 4 $\times$  strength antibiotic solutions prepared as serial twofold dilutions, and the bacterial strain to be tested at a concentration of  $2 \times 10^6$  cfu/mL. In a 96-well plate, 100  $\mu$ L of 2 $\times$  TSB-C, 50  $\mu$ L each of the antibiotic dilutions, and the organism suspension are mixed and incubated at  $37^{\circ}\text{C}$  for 18–24 h. The lowest concentration showing inhibition of growth was considered the MIC of the organism (13).

**Ethidium Bromide Uptake Assay.** WT *Fn*, *lpxD1*-null, and *lpxD2*-null were grown overnight in TSB-C broth at  $25^{\circ}\text{C}$  and in-

oculated for a further 5 h in fresh medium. Cells were harvested and resuspended in PBS. The optical density at 600 nm was measured and adjusted to a final optical density reading of 0.1. Aliquots of the individual bacterial backgrounds (180  $\mu$ L) were transferred to the 96-well plate. Twenty microliters of ethidium bromide (EtBr) (final concentration: 2.5  $\mu$ M, 5  $\mu$ M, 10  $\mu$ M) was added to each of the individual wells. Fluorescence was read from the bottom of the wells using excitation and emission filter of 535 nm and 595 nm, respectively. Readings were taken at 2 min per time over a total of 30 min at  $25^{\circ}\text{C}$  (13).

**Organ Bacterial Burden.** Mice were injected s.c. with *lpxD1*-null mutant and killed at indicated time points. Spleen and liver were harvested, homogenized, and serially diluted. The serial dilutions were then plated on TSB plates supplemented with 0.1% cysteine and plates were incubated at  $37^{\circ}\text{C}$  for 24–72 h before determination of colony forming units (cfu).

1. Westphal O, Jann K (1965) Bacterial lipopolysaccharides: Extraction with phenol-water and further applications of the procedure. *Methods Carbohydr. Chem* 5: 83–91.
2. Fischer W, Koch HU, Haas R (1983) Improved preparation of lipoteichoic acids. *Eur J Biochem* 133:523–530.
3. Folch J, Lees M, Sloane Stanley GH (1957) A simple method for the isolation and purification of total lipides from animal tissues. *J Biol Chem* 226:497–509.
4. Hirschfeld M, Ma Y, Weis JH, Vogel SN, Weis JJ (2000) Cutting edge: Repurification of lipopolysaccharide eliminates signaling through both human and murine toll-like receptor 2. *J Immunol* 165:618–622.
5. Caroff M, Tacken A, Szabó L (1988) Detergent-accelerated hydrolysis of bacterial endotoxins and determination of the anomeric configuration of the glycosyl phosphate present in the "isolated lipid A" fragment of the Bordetella pertussis endotoxin. *Carbohydr Res* 175:273–282.
6. Li Y, Wang X, Ernst RK (2011) A rapid one-step method for the characterization of membrane lipid remodeling in using matrix-assisted laser desorption ionization time-of-flight tandem mass spectrometry. *Rapid Commun Mass Spectrom* 25: 2641–2648.
7. Darveau RP, et al. (1995) Ability of bacteria associated with chronic inflammatory disease to stimulate E-selectin expression and promote neutrophil adhesion. *Infect Immun* 63:1311–1317.
8. Somerville JE, Jr., Cassiano L, Bainbridge B, Cunningham MD, Darveau RP (1996) A novel Escherichia coli lipid A mutant that produces an antiinflammatory lipopolysaccharide. *J Clin Invest* 97:359–365.
9. Wang X, Ribeiro AA, Guan Z, Abraham SN, Raetz CR (2007) Attenuated virulence of a *Francisella* mutant lacking the lipid A 4'-phosphatase. *Proc Natl Acad Sci USA* 104: 4136–4141.
10. LoVullo ED, Sherrill LA, Pavelka MS, Jr. (2009) Improved shuttle vectors for *Francisella tularensis* genetics. *FEMS Microbiol Lett* 291:95–102.
11. Bartling CM, Raetz CR (2009) Crystal structure and acyl chain selectivity of Escherichia coli LpxD, the N-acyltransferase of lipid A biosynthesis. *Biochemistry* 48:8672–8683.
12. Bartling CM, Raetz CR (2008) Steady-state kinetics and mechanism of LpxD, the N-acyltransferase of lipid A biosynthesis. *Biochemistry* 47:5290–5302.
13. Murata T, Tseng W, Guina T, Miller SI, Nikaido H (2007) PhoPQ-mediated regulation produces a more robust permeability barrier in the outer membrane of *Salmonella enterica* serovar typhimurium. *J Bacteriol* 189:7213–7222.



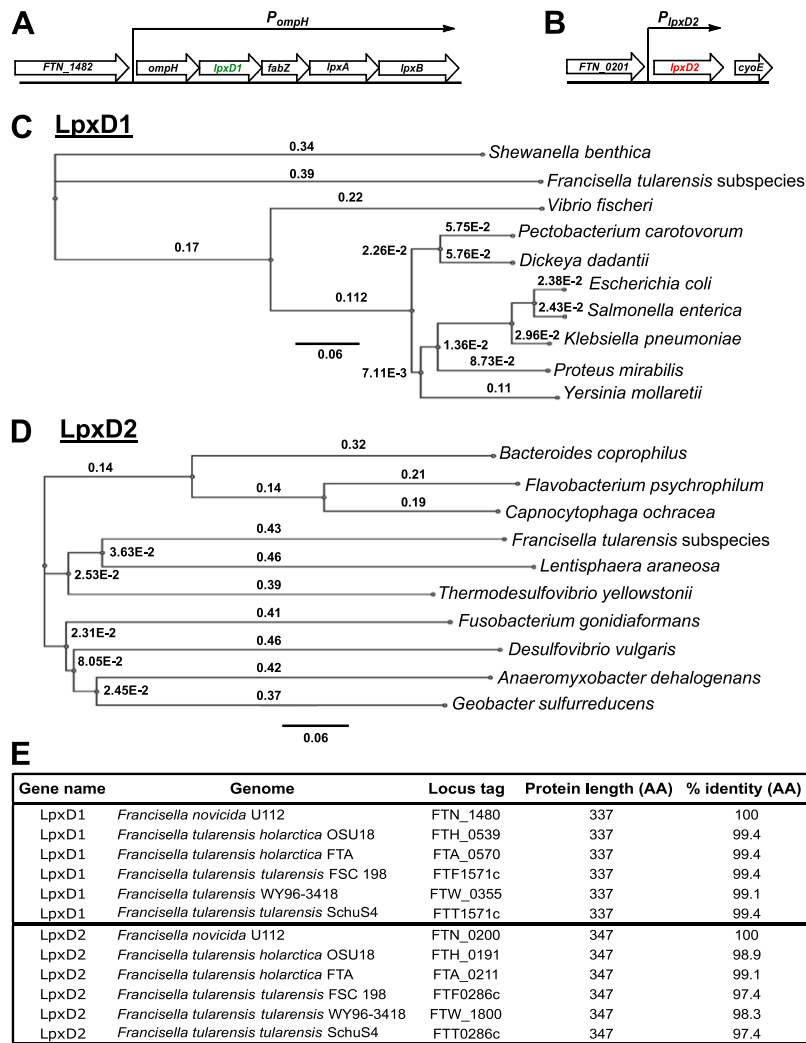

**Fig. S2.** Genetic organization and phylogenetic tree analysis of LpxD1 and LpxD2. Genetic organization of (A) *lpxD1* and (B) *lpxD2* locus in *Ft* genome, showing *lpxD1* lies within one operon and *lpxD2* is on the other side of the genome and is driven by its own promoter. (C) Phylogenetic tree analysis of LpxD1. (D) Phylogenetic tree analysis of LpxD2. (E) Conservation of LpxD in *Francisella* subspecies.

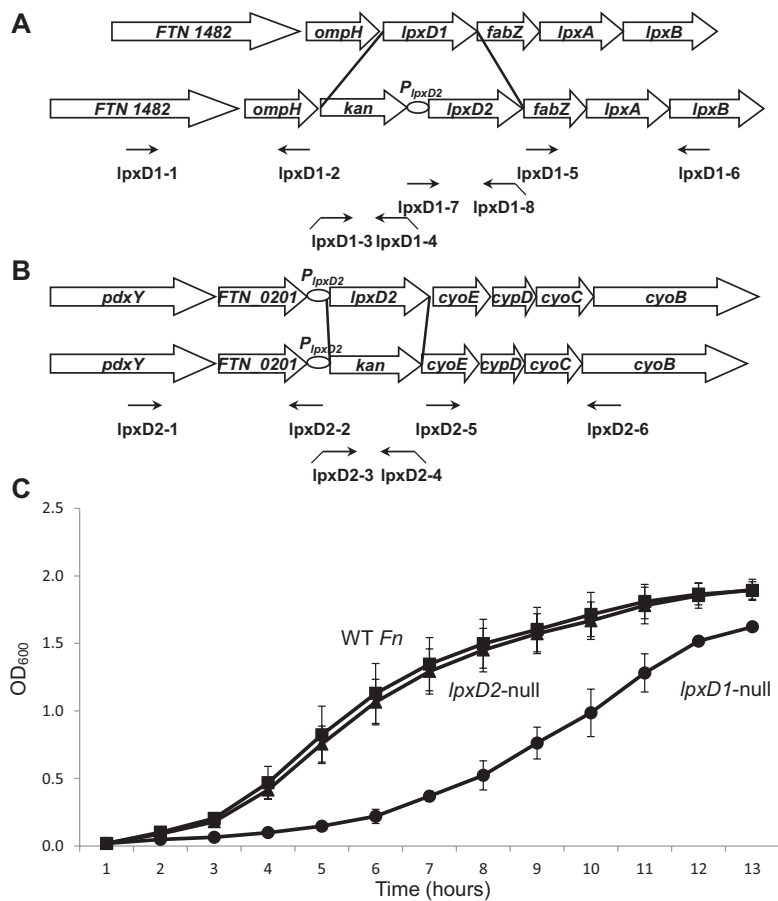

Fig. 53. Generation of (A) *lpxD1*-null and (B) *lpxD2*-null mutant. (C) Growth curves of *lpxD1*-null, *lpxD2*-null, and WT *Fn* at 37 °C.

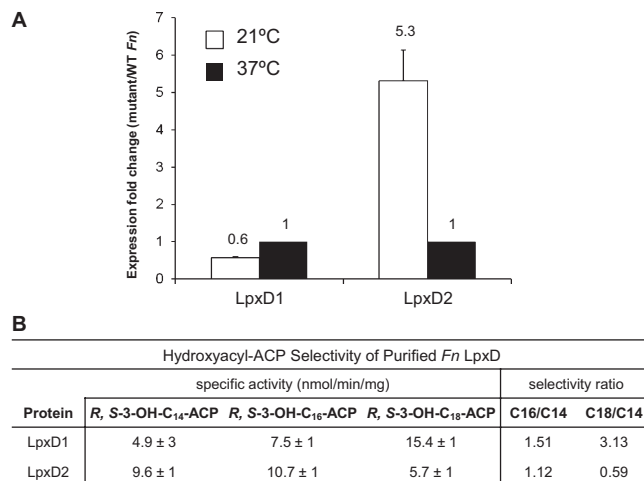

Fig. 54. (A) Quantitative PCR of *lpxD1* and *lpxD2* at 21 °C and 37 °C. (B) Hydroxyacyl ACP selectivity of purified *Fn* LpxD enzymes.

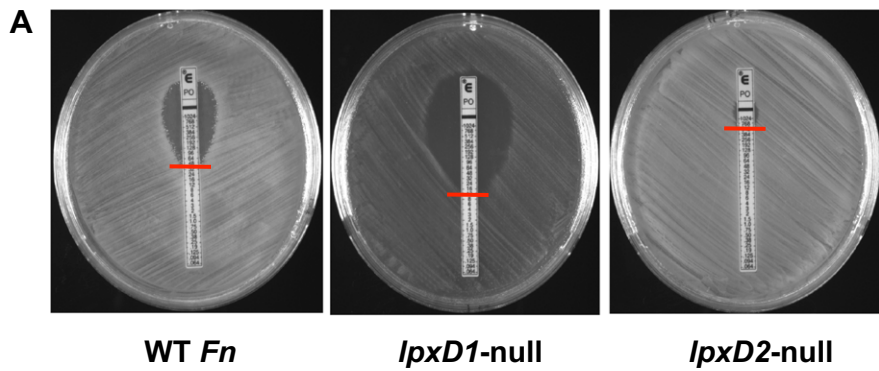

**B**

Minimum Inhibitory Concentration (ug/ml)

|                 | Wild-type    | <i>lpxD1</i> -null | <i>lpxD2</i> -null |
|-----------------|--------------|--------------------|--------------------|
| Chloramphenicol | 0.8 ± 0.1    | 0.2 ± 0.1          | 0.8 ± 0.1          |
| Carbenicillin   | 125.0 ± 10.0 | 62.5 ± 10.0        | 31.3 ± 10.0        |
| Ciprofloxacin   | 0.3 ± 0.1    | 0.02 ± 0.01        | 0.3 ± 0.1          |
| Erythromycin    | 3.1 ± 0.1    | 0.08 ± 0.05        | 0.08 ± 0.05        |
| Rifampin        | 0.6 ± 0.1    | 0.02 ± 0.01        | 0.6 ± 0.1          |
| Vancomycin      | 100 ± 10.0   | 6.3 ± 1            | 100 ± 10.0         |

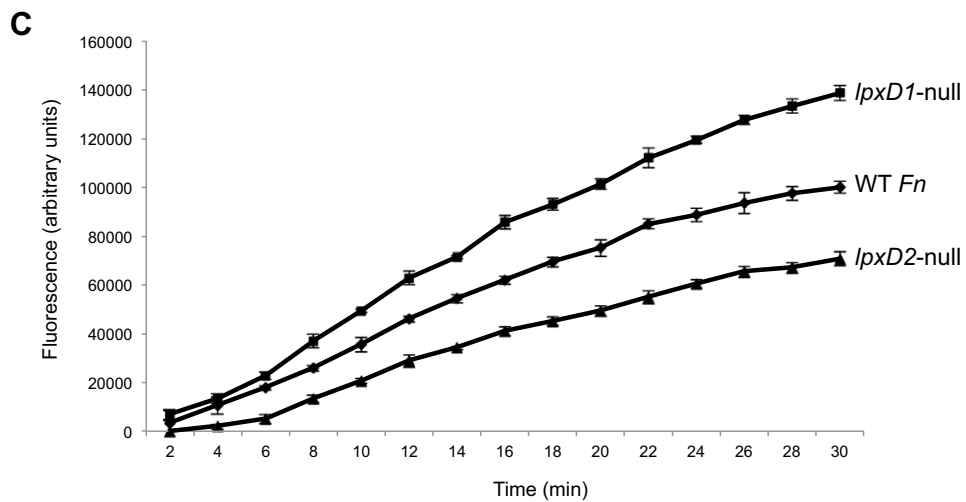

**Fig. S5.** Antibiotic resistance test of *lpxD1*-null and *lpxD2*-null *Fn* mutants. (A) Polymyxin B hypersensitivity of *lpxD1*-null, *lpxD2*-null, and WT *Fn*. (B) Antibiotic minimum inhibitory concentration (MIC) of *lpxD1*-null, *lpxD2*-null, and WT *Fn*. (C) Ethidium bromide uptake assay for *lpxD1*-null, *lpxD2*-null, and WT *Fn*.

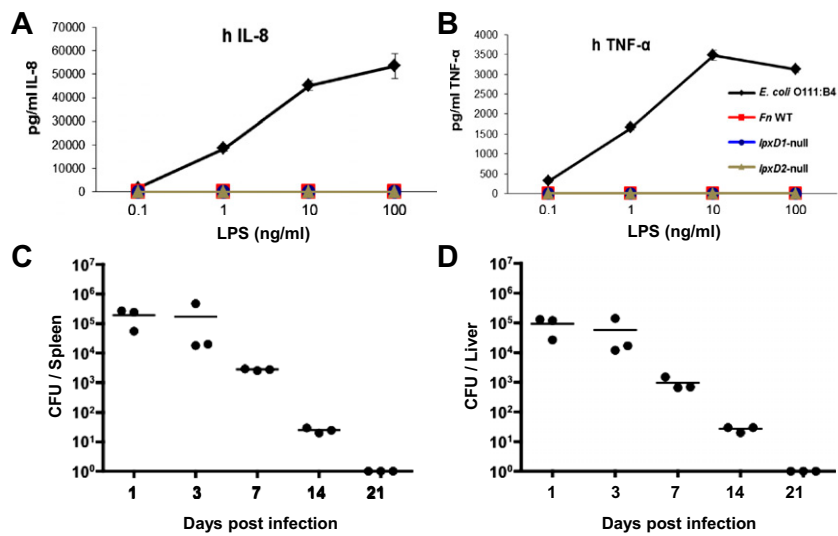

**Fig. S6.** (A) IL-8 and (B) TNF- $\alpha$  production by human macrophages THP-1 cell after stimulation with LPS isolated from *lpxD1*-null, *lpxD2*-null, WT *Fn* LPS, or purified *E. coli* O111:B4 LPS (positive control). Bacterial burden in C57BL/6 (C) liver and (D) spleen after s.c. infection with *lpxD1*-null *Fn* mutant ( $5.7 \times 10^6$  cfu).

**Table S1.** Fragment ion intensities from selected linear ion trap MS<sup>n</sup> spectra

[Table S1](#)

**Table S2.** Microarray data

[Table S2](#)

**Table S3.** Bacterial strains and plasmids used in this work

[Table S3](#)
